# Supplementary material
Source: publisher site journal article supplement (https://www.dovepress.com/article/454076)

## Supplemental Materials for

Trends in the notification rates and Treatment Outcome of Tuberculosis in Shandong Province, China, 2005-2021

This file includes:

Figure S1 to S2

**Figure S1** Change in notification rates of registered TB estimated by joinpoint model (solid line) in Shandong Province, 2005 - 2021.

\*  $p < 0.05$

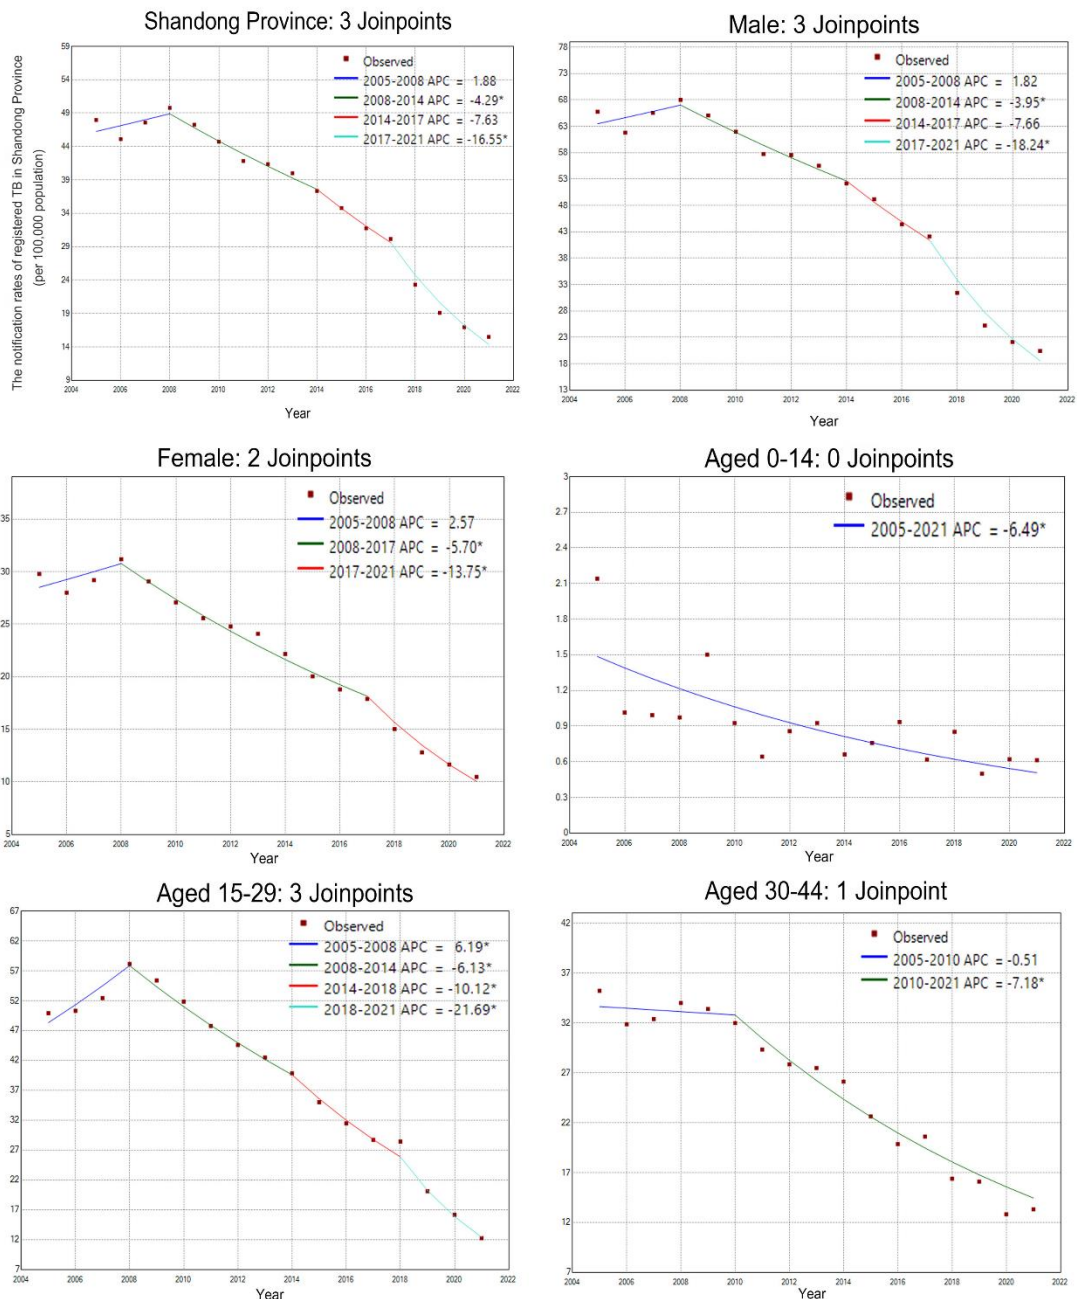

Aged 45-59: 1 Joinpoint

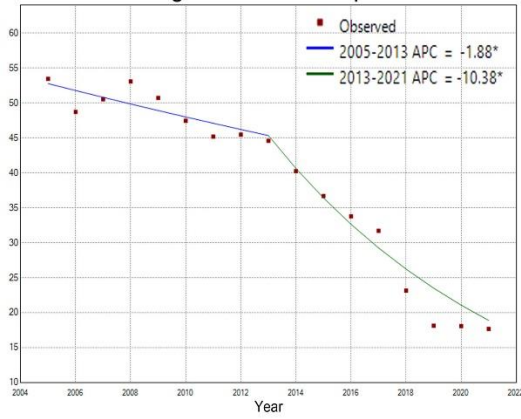

Aged ≥60: 1 Joinpoint

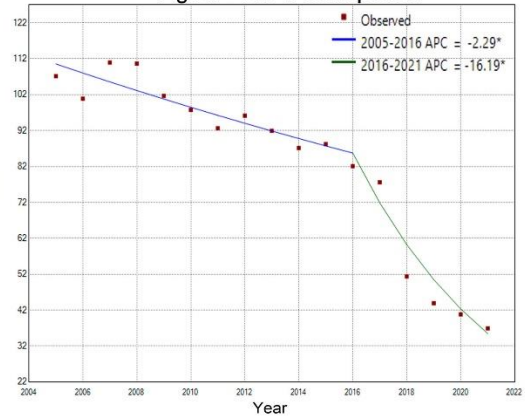

New case: 3 Joinpoints

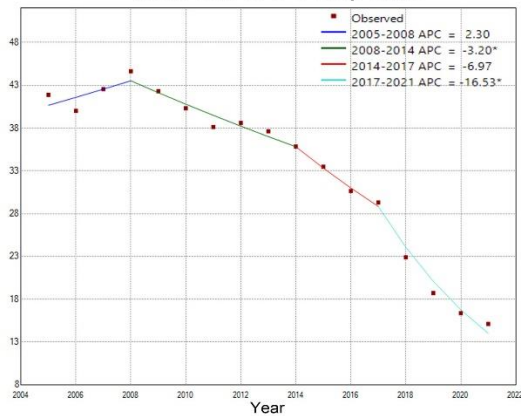

Relapse case: 1 Joinpoint

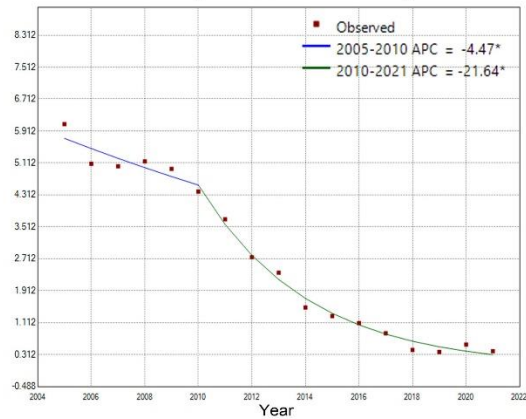

Rural: 2 Joinpoints

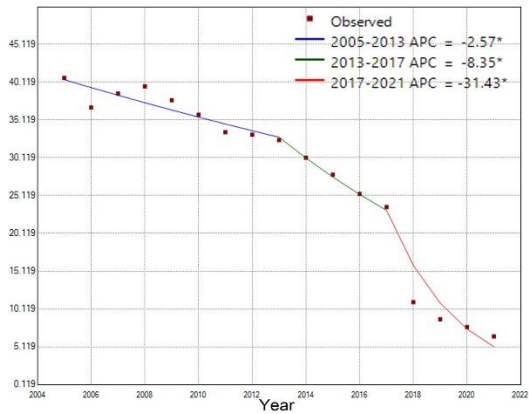

Urban: 2 Joinpoints

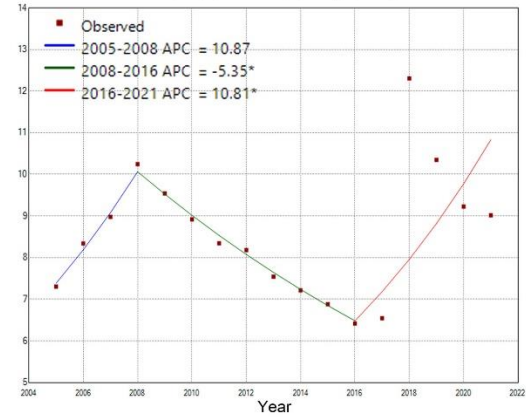

Floating: 3 Joinpoints

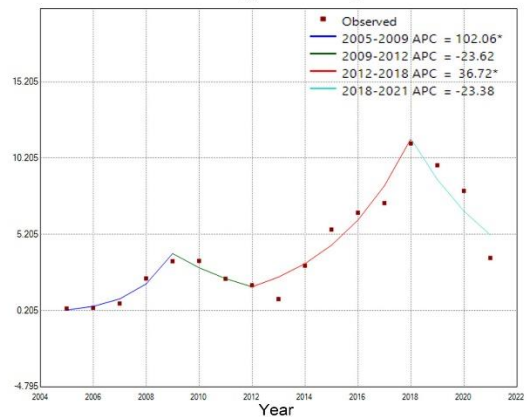

No floating: 1 Joinpoint

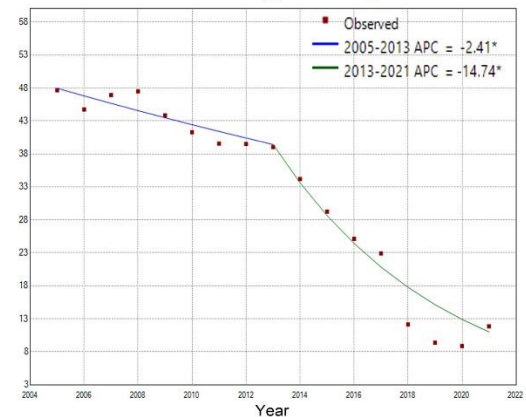

**Figure S2** Change in notification rates of bacteriologically confirmed TB estimated by joinpoint model (solid line) in Shandong Province, 2005 - 2021.

\*  $p < 0.05$

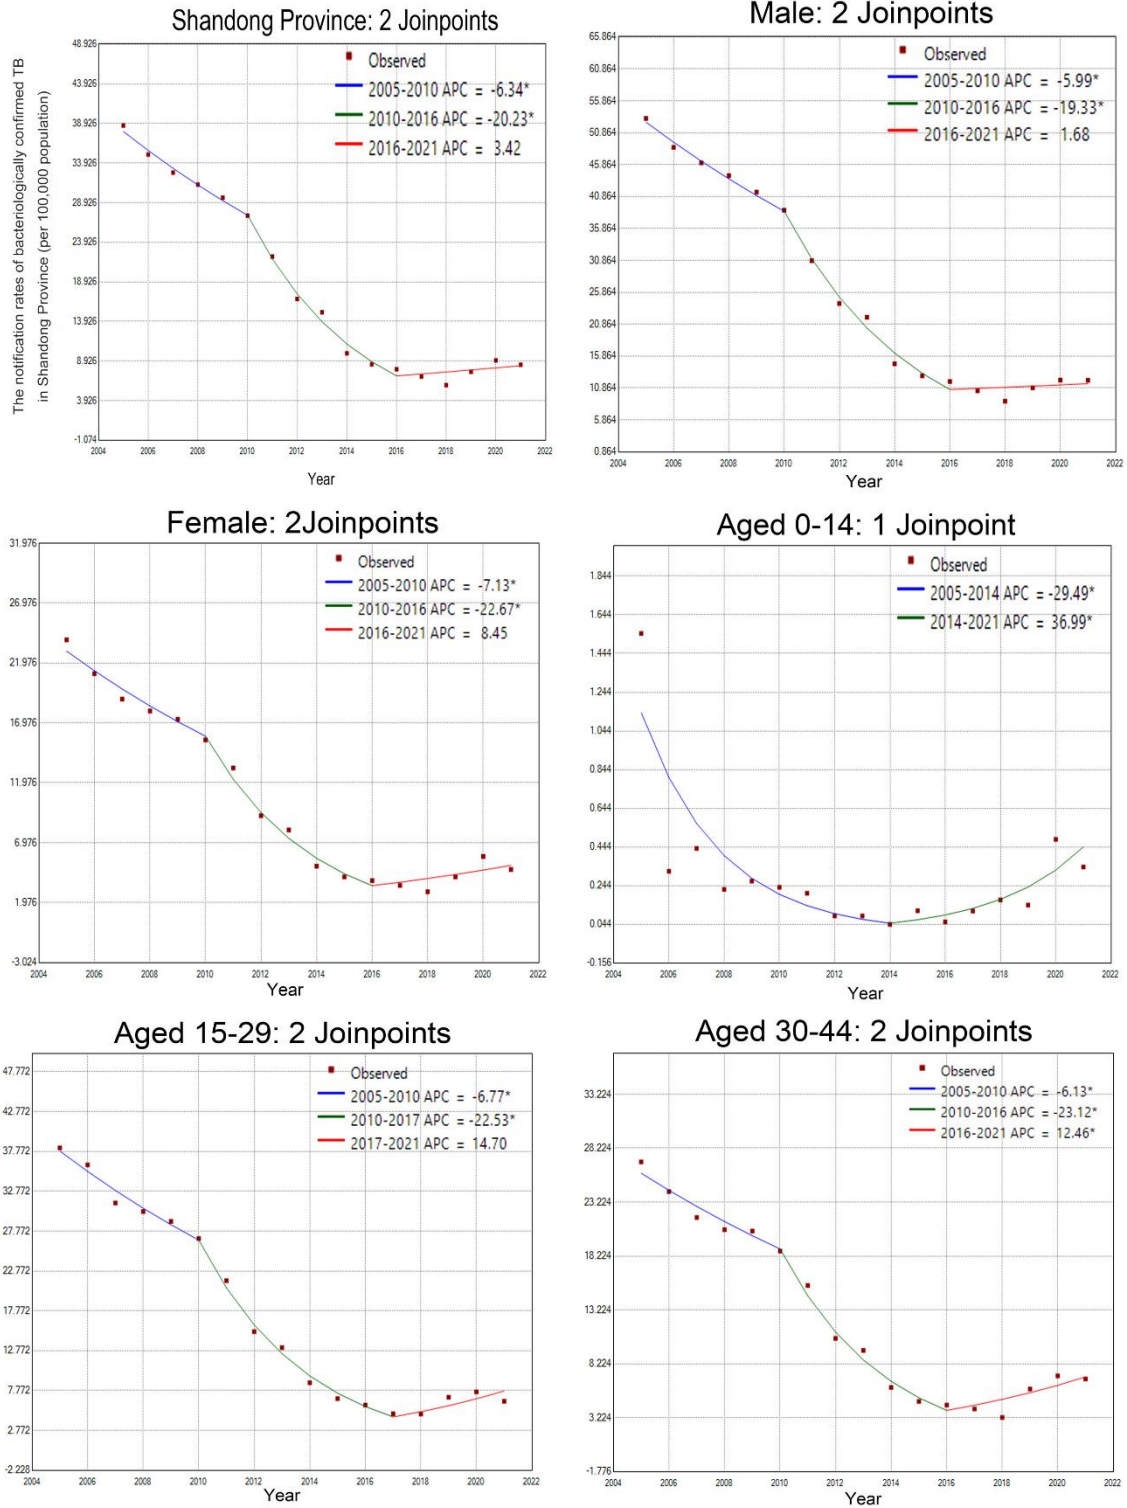

Aged 45-59: 2 Joinpoints

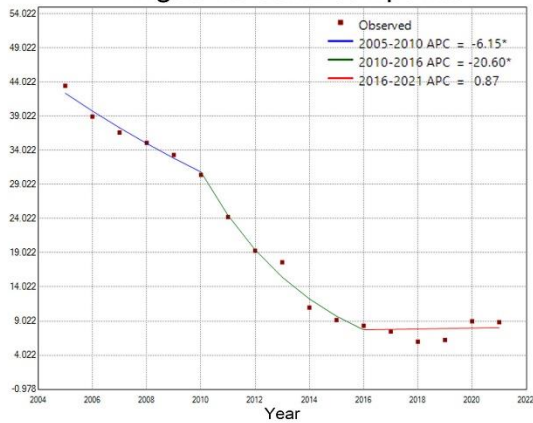

Aged ≥ 60: 2 Joinpoints

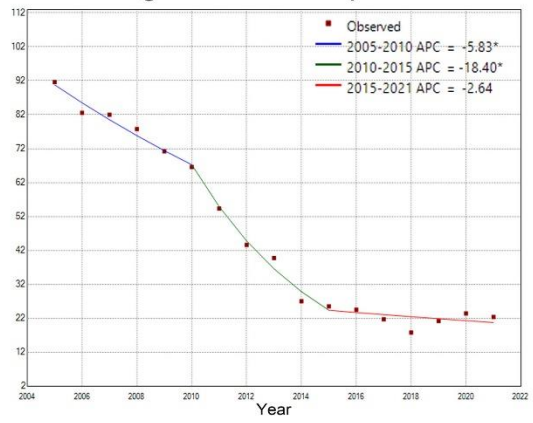

New case: 2 Joinpoints

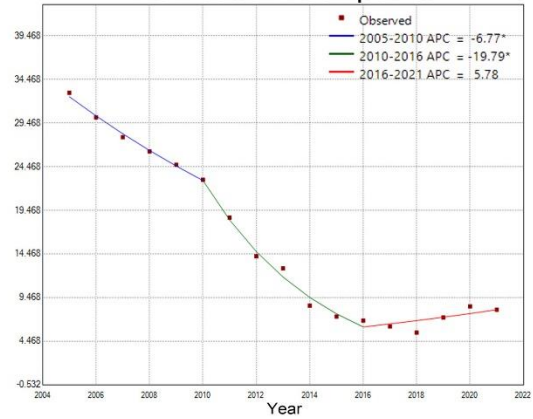

Relapse case: 1 Joinpoint

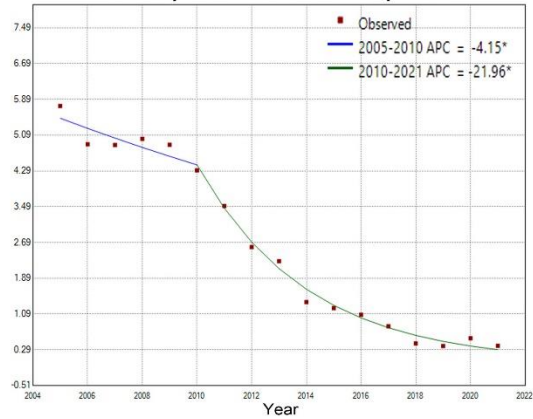

Rural: 2 Joinpoints

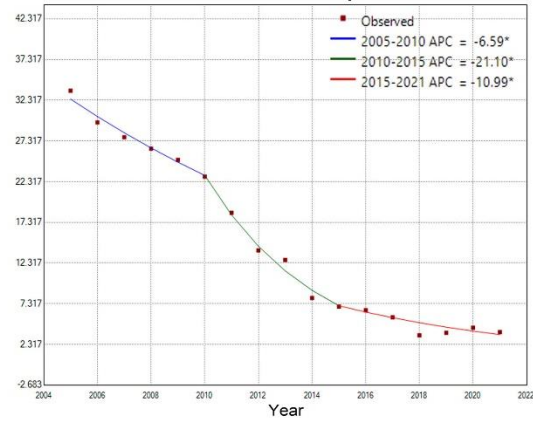

Urban: 2 Joinpoints

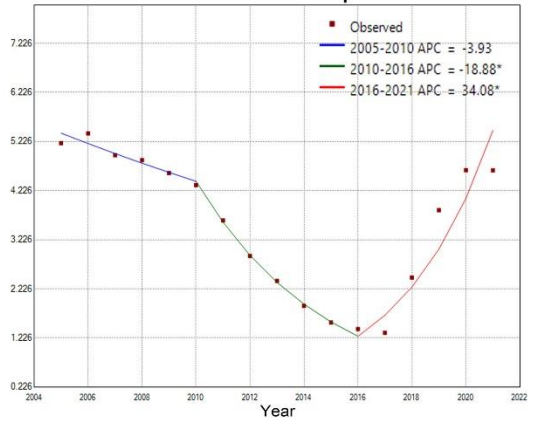

Floating: 2 Joinpoints

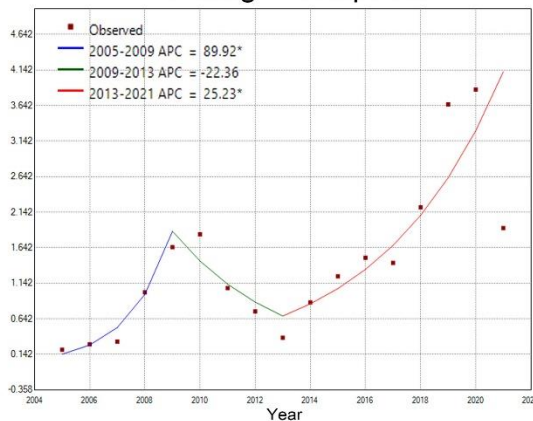

No floating: 2 Joinpoints

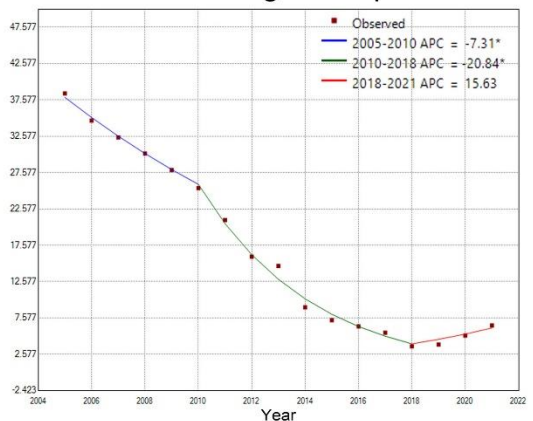

Supplement: Supplementary file 1 [file get_supplementary_file.php]
